# Supplementary material for: Erythropoietin Abrogates Post-Ischemic Activation of the NLRP3, NLRC4, and AIM2 Inflammasomes in Microglia/Macrophages in a TAK1-Dependent Manner
Source: PubMed Central journal article supplement (PMC9046144; doi:10.1007/s12975-021-00948-8), 2021-10-09

# Erythropoietin abrogates post-ischemic activation of the NLRP3, NLRC4 and AIM2 inflammasomes in microglia/macrophages in a TAK1-dependent manner

Ole Heinisch<sup>1</sup>, Thomas Zeyen<sup>1,2</sup>, Tobias Goldmann<sup>3</sup>, Marco Prinz<sup>3,4,5</sup>, Michael Huber<sup>6</sup>, Jennifer Jung<sup>1</sup>, Eren Arik<sup>1</sup>, Shahin Habib<sup>7</sup>, Alexander Slowik<sup>8</sup>, Arno Reich<sup>1</sup>, Jörg B. Schulz<sup>1,9</sup>, Pardes Habib<sup>1,6,9, CA</sup>

Department of Neurology, Medical Faculty, RWTH Aachen University, Aachen, Germany, 2) Department of Neurology, University Hospital of Bonn, Bonn, Germany, 3) Institute of Neuropathology, Faculty of Medicine, University of Freiburg, Freiburg, Germany, 4) Signalling Research Centres BIOSS and CIBSS, University of Freiburg, Freiburg, Germany. 5) Center for Basics in NeuroModulation (NeuroModulBasics), Faculty of Medicine, University of Freiburg, Freiburg, Germany. 6) Institute of Biochemistry and Molecular Immunology, Medical Faculty, RWTH Aachen University, Aachen, Germany. 7) Medical Biochemistry, Department of Biochemistry, University of Leicester, Leicester, United Kingdom. 8) Department of Anatomy and Cell Biology, Medical Faculty, RWTH Aachen University, Aachen, Germany. 9) JARA-BRAIN Institute of Molecular Neuroscience and Neuroimaging, Forschungszentrum Jülich GmbH and RWTH Aachen University, Aachen, Germany  
Corresponding author: Pardes Habib, M.D./Ph.D., Department of Neurology, RWTH Aachen University, Pauwelsstraße 30, D-52074 Aachen, Germany, Phone: +49 241 80 37836, Fax: +49 241 80 82582, Email: phabib@ukaachen.de

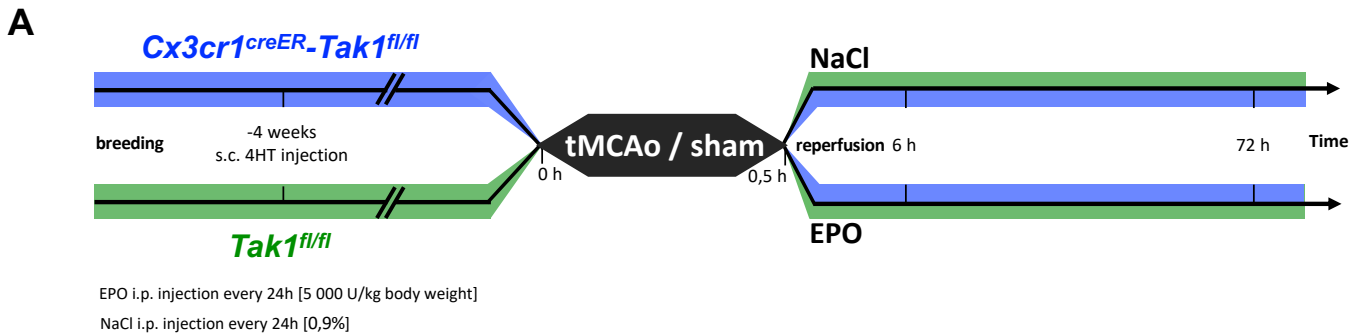

**B**

| Model            | sham                                                                      |     |      |     | 30 min tMCAo                |     |      |     |                                                    |     |      |     |
|------------------|---------------------------------------------------------------------------|-----|------|-----|-----------------------------|-----|------|-----|----------------------------------------------------|-----|------|-----|
| Animal numbers   | 16                                                                        |     |      |     | 48                          |     |      |     |                                                    |     |      |     |
| Genotype         | <i>Tak1<sup>fl/fl</sup> / Cx3cr1<sup>creER</sup>-Tak1<sup>fl/fl</sup></i> |     |      |     | <i>Tak1<sup>fl/fl</sup></i> |     |      |     | <i>Cx3cr1<sup>creER</sup>-Tak1<sup>fl/fl</sup></i> |     |      |     |
| Animal numbers   | 16                                                                        |     |      |     | 24                          |     |      |     | 24                                                 |     |      |     |
| Reperfusion time | 6 h                                                                       |     | 72 h |     | 6 h                         |     | 72 h |     | 6 h                                                |     | 72 h |     |
| Animal numbers   | 8                                                                         |     | 8    |     | 12                          |     | 12   |     | 12                                                 |     | 12   |     |
| Treatment        | NaCl                                                                      | EPO | NaCl | EPO | NaCl                        | EPO | NaCl | EPO | NaCl                                               | EPO | NaCl | EPO |
| Animal numbers   | 4                                                                         | 4   | 4    | 4   | 6                           | 6   | 6    | 6   | 6                                                  | 6   | 6    | 6   |

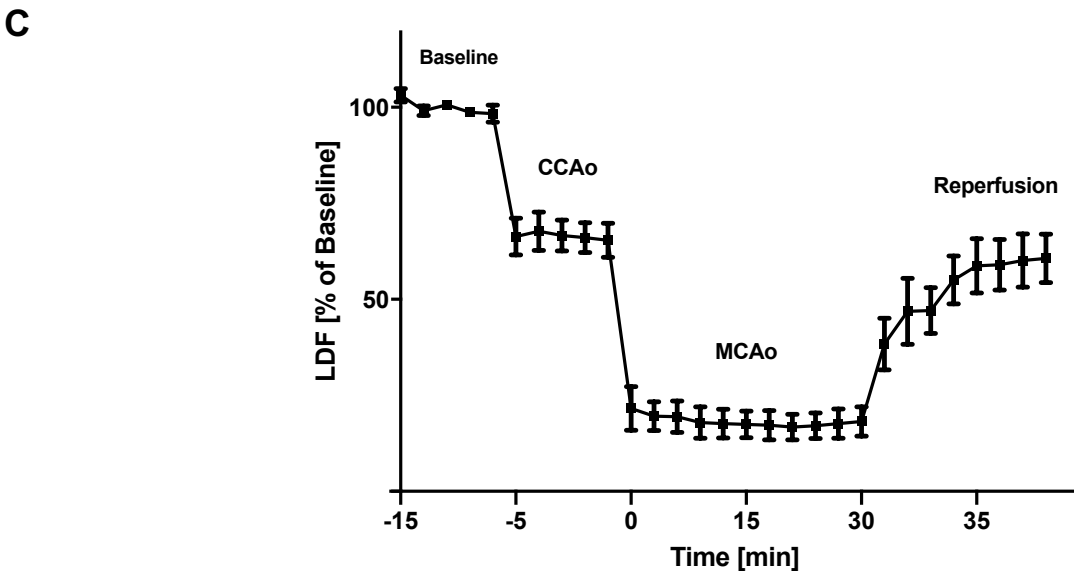

# Erythropoietin abrogates post-ischemic activation of the NLRP3, NLRC4 and AIM2 inflammasomes in microglia/macrophages in a TAK1-dependent manner

Ole Heinisch<sup>1</sup>, Thomas Zeyen<sup>1,2</sup>, Tobias Goldmann<sup>3</sup>, Marco Prinz<sup>3,4,5</sup>, Michael Huber<sup>6</sup>, Jennifer Jung<sup>1</sup>, Eren Arik<sup>1</sup>, Shahin Habib<sup>7</sup>, Alexander Slowik<sup>8</sup>, Arno Reich<sup>1</sup>, Jörg B. Schulz<sup>1,9</sup>, Pardes Habib<sup>1,6,9, CA</sup>

Department of Neurology, Medical Faculty, RWTH Aachen University, Aachen, Germany. 2) Department of Neurology, University Hospital of Bonn, Bonn, Germany, 3) Institute of Neuropathology, Faculty of Medicine, University of Freiburg, Freiburg, Germany, 4) Signalling Research Centres BIOSS and CIBSS, University of Freiburg, Freiburg, Germany. 5) Center for Basics in NeuroModulation (NeuroModulBasics), Faculty of Medicine, University of Freiburg, Freiburg, Germany. 6) Institute of Biochemistry and Molecular Immunology, Medical Faculty, RWTH Aachen University, Aachen, Germany. 7) Medical Biochemistry, Department of Biochemistry, University of Leicester, Leicester, United Kingdom. 8) Department of Anatomy and Cell Biology, Medical Faculty, RWTH Aachen University, Aachen, Germany. 9) JARA-BRAIN Institute of Molecular Neuroscience and Neuroimaging, Forschungszentrum Jülich GmbH and RWTH Aachen University, Aachen, Germany

Corresponding author: Pardes Habib, M.D./Ph.D., Department of Neurology, RWTH Aachen University, Pauwelsstraße 30, D-52074 Aachen, Germany, Phone: +49 241 80 37836, Fax: +49 241 80 82582, Email: phabib@ukaachen.de

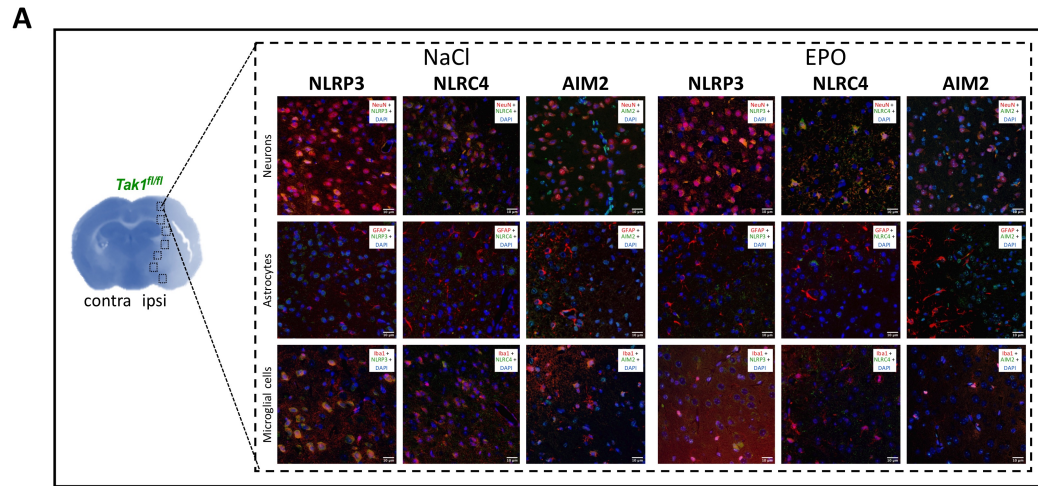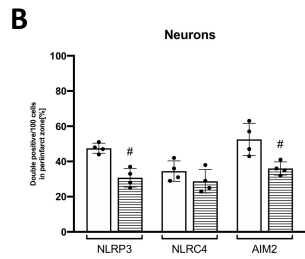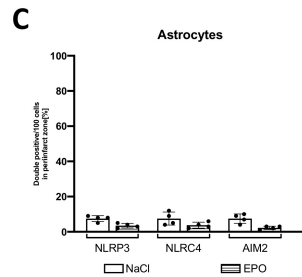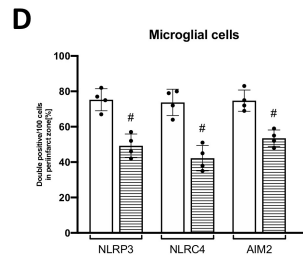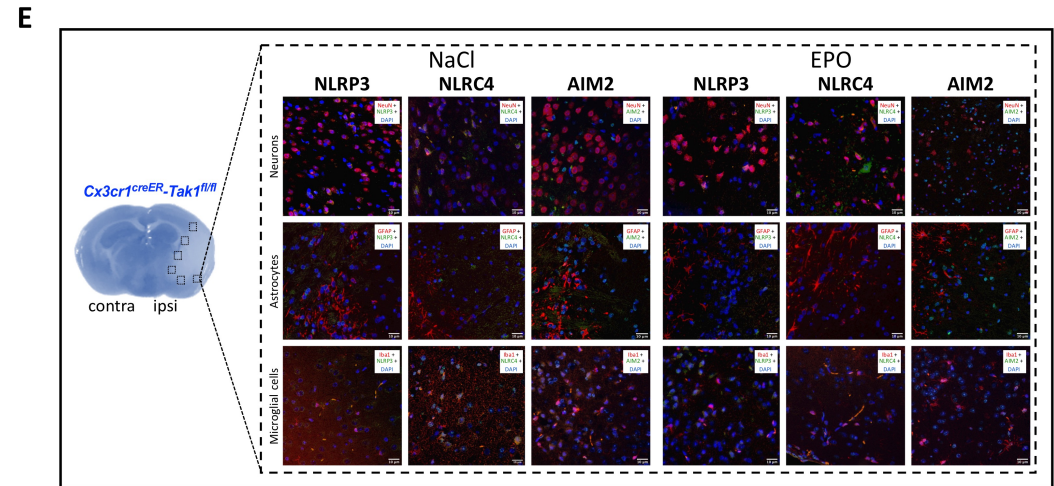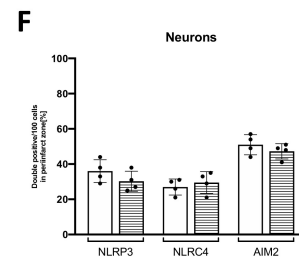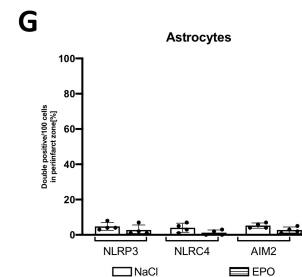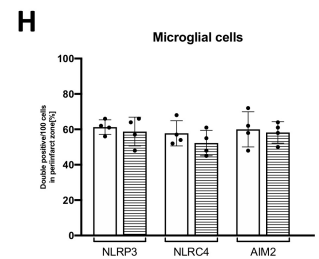

# Erythropoietin abrogates post-ischemic activation of the NLRP3, NLRCA4 and AIM2 inflammasomes in microglia/macrophages in a TAK1-dependent manner

Ole Heinisch<sup>1</sup>, Thomas Zeyen<sup>1,2</sup>, Tobias Goldmann<sup>3</sup>, Marco Prinz<sup>3,4,5</sup>, Michael Huber<sup>6</sup>, Jennifer Jung<sup>1</sup>, Eren Arik<sup>1</sup>, Shahin Habib<sup>7</sup>, Alexander Slowik<sup>8</sup>, Arno Reich<sup>1</sup>, Jörg B. Schulz<sup>1,9</sup>, Pardes Habib<sup>1,6,9, CA</sup>

Department of Neurology, Medical Faculty, RWTH Aachen University, Aachen, Germany, 2) Department of Neurology, University Hospital of Bonn, Bonn, Germany, 3) Institute of Neuropathology, Faculty of Medicine, University of Freiburg, Freiburg, Germany, 4) Signalling Research Centres BIOS and CIBSS, University of Freiburg, Freiburg, Germany. 5) Center for Basics in NeuroModulation (NeuroModulBasics), Faculty of Medicine, University of Freiburg, Freiburg, Germany. 6) Institute of Biochemistry and Molecular Immunology, Medical Faculty, RWTH Aachen University, Aachen, Germany. 7) Medical Biochemistry, Department of Biochemistry, University of Leicester, Leicester, United Kingdom. 8) Department of Anatomy and Cell Biology, Medical Faculty, RWTH Aachen University, Aachen, Germany. 9) JARA-BRAIN Institute of Molecular Neuroscience and Neuroimaging, Forschungszentrum Jülich GmbH and RWTH Aachen University, Aachen, Germany  
Corresponding author: Pardes Habib, M.D./Ph.D., Department of Neurology, RWTH Aachen University, Pauwelsstraße 30, D-52074 Aachen, Germany, Phone: +49 241 80 37836, Fax: +49 241 80 82582, Email: phabib@ukaachen.de

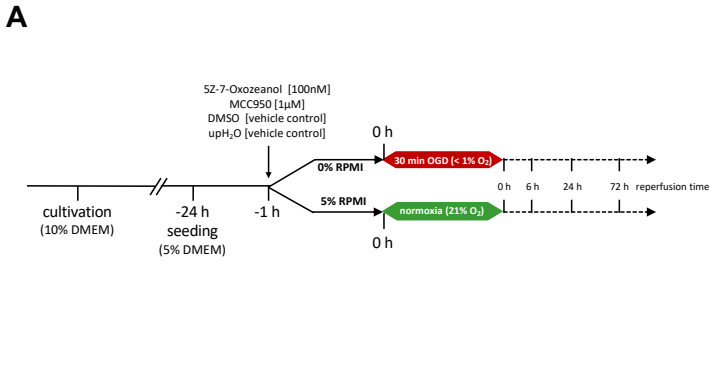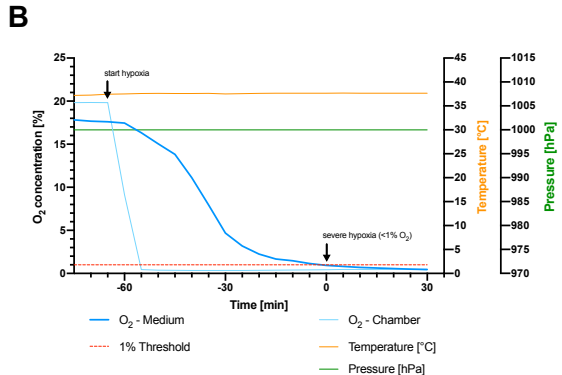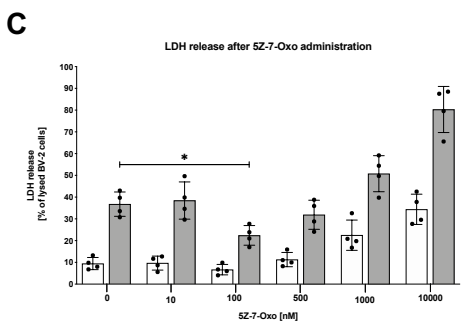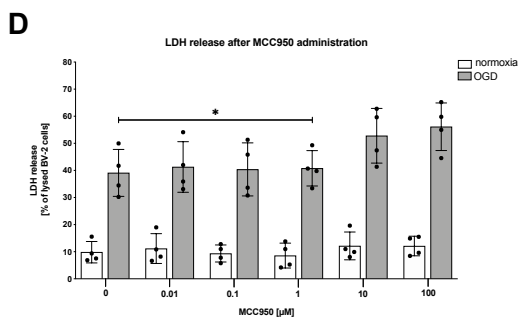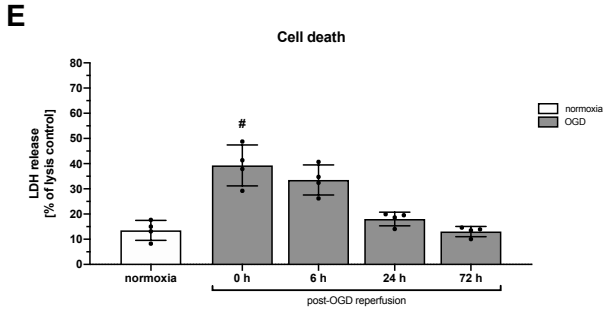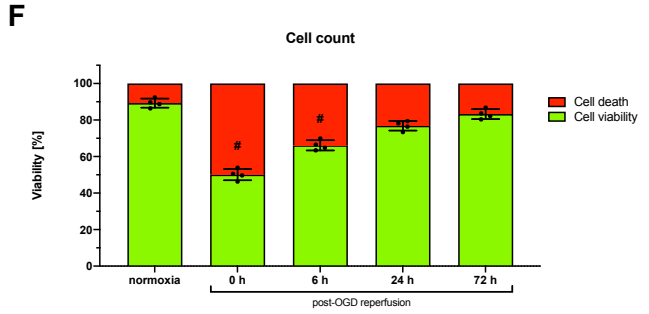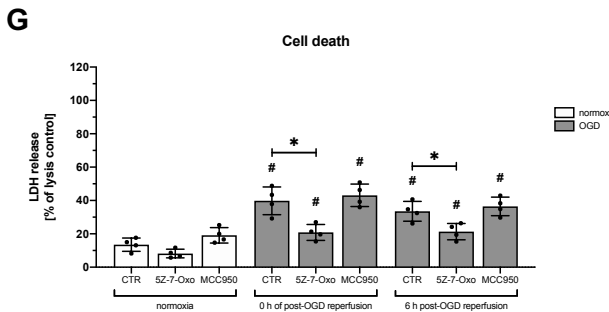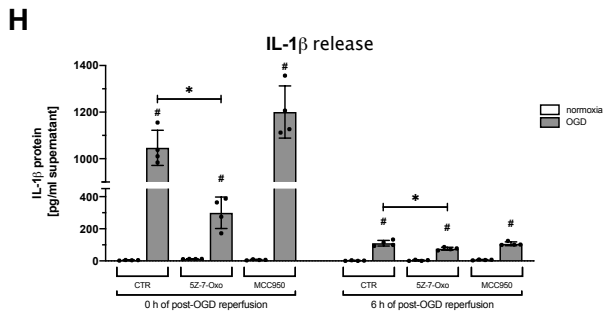

# Erythropoietin abrogates post-ischemic activation of the NLRP3, NLRC4 and AIM2 inflammasomes in microglia/macrophages in a TAK1-dependent manner

Ole Heinisch<sup>1</sup>, Thomas Zeyen<sup>1,2</sup>, Tobias Goldmann<sup>3</sup>, Marco Prinz<sup>3,4,5</sup>, Michael Huber<sup>6</sup>, Jennifer Jung<sup>1</sup>, Eren Arik<sup>1</sup>, Shahin Habib<sup>7</sup>, Alexander Slowik<sup>8</sup>, Arno Reich<sup>1</sup>, Jörg B. Schulz<sup>1,9</sup>, Pardes Habib<sup>1,6,9, CA</sup>

Department of Neurology, Medical Faculty, RWTH Aachen University, Aachen, Germany, 2) Department of Neurology, University Hospital of Bonn, Bonn, Germany, 3) Institute of Neuropathology, Faculty of Medicine, University of Freiburg, Freiburg, Germany, 4) Signalling Research Centres BIOSS and CIBSS, University of Freiburg, Freiburg, Germany. 5) Center for Basics in NeuroModulation (NeuroModulBasics), Faculty of Medicine, University of Freiburg, Freiburg, Germany. 6) Institute of Biochemistry and Molecular Immunology, Medical Faculty, RWTH Aachen University, Aachen, Germany. 7) Medical Biochemistry, Department of Biochemistry, University of Leicester, Leicester, United Kingdom. 8) Department of Anatomy and Cell Biology, Medical Faculty, RWTH Aachen University, Aachen, Germany. 9) JARA-BRAIN Institute of Molecular Neuroscience and Neuroimaging, Forschungszentrum Jülich GmbH and RWTH Aachen University, Aachen, Germany

Corresponding author: Pardes Habib, M.D./Ph.D., Department of Neurology, RWTH Aachen University, Pauwelsstraße 30, D-52074 Aachen, Germany, Phone: +49 241 80 37836, Fax: +49 241 80 82582, Email: phabib@ukaachen.de

**A**

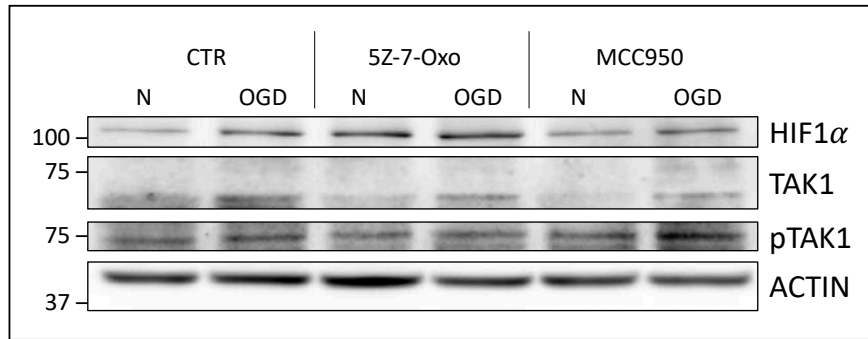

□ normoxia

**B**

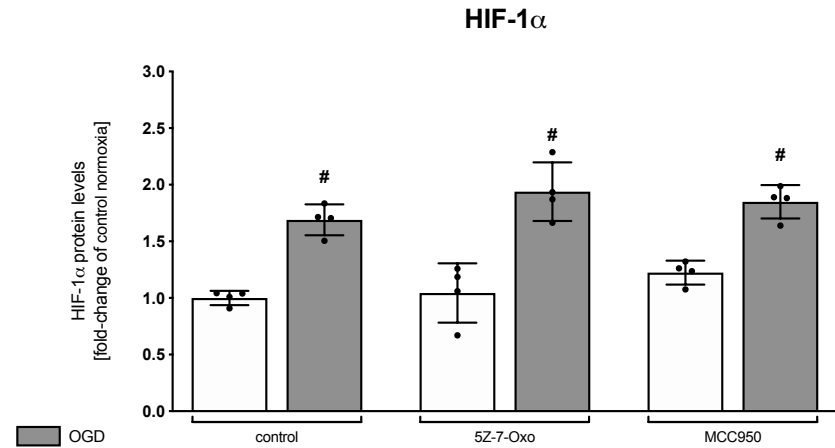

**D**

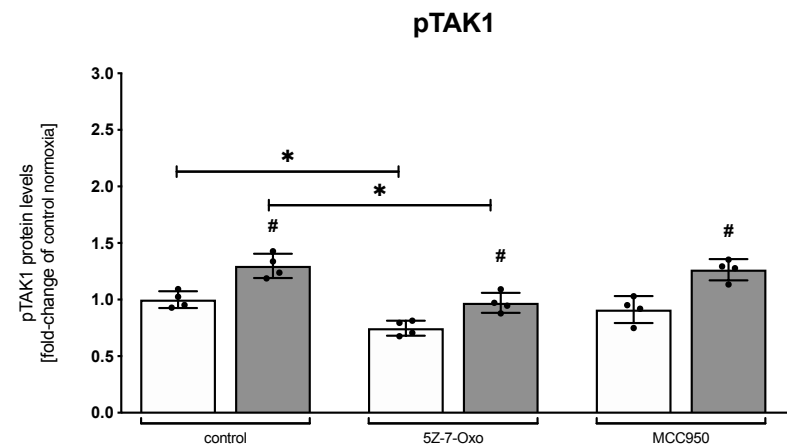

**C**

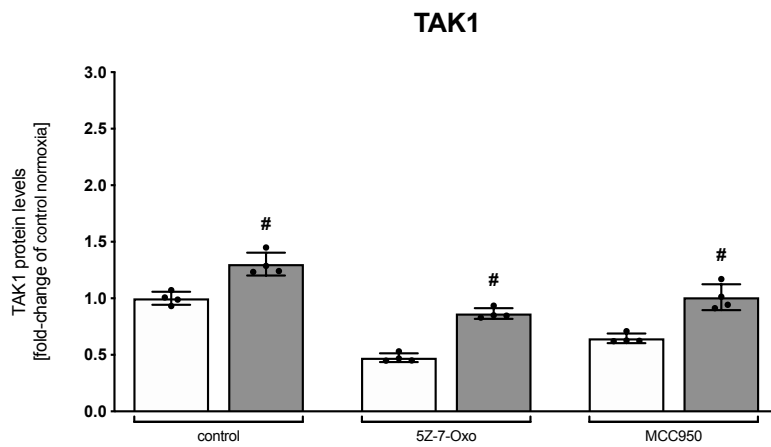

Supplement: 12975_2021_948_MOESM1_ESM.pdf [file 12975_2021_948_MOESM1_ESM.pdf]
